# Supplementary material for: The Mysterious Amurian Grig Paracyphoderris erebeus Storozhenko, 1980 (Orthoptera: Prophalangopsidae): New Data on Its Distribution, Ecology and Biology
Source: MDPI journal article supplement (doi:10.3390/insects14100789), 2023-09-27
Supplement: s1 [file s1]

Table S1. Geographic coordinates of known records of *Paracyphocerris erebeus* in its range.

| Region     | Locality                                                                                            | Geographic coordinates           | Altitude, m   | Date              | Specimens         | Collector           | Natural Reserve |
|------------|-----------------------------------------------------------------------------------------------------|----------------------------------|---------------|-------------------|-------------------|---------------------|-----------------|
| Khabarovsk | <b>Myaochan Ridge, 40 km NW Komsomolsk-on-Amur, settlement Tikhyy</b>                               | <b>50.7458 N/<br/>136.5114 E</b> | <b>650</b>    | <b>23.08.1976</b> | <b>1♂, 2♀</b>     | <b>V.A. Mutin</b>   |                 |
|            | same locality                                                                                       |                                  |               | 5.07.1997         | 2 nymphs          | V.A. Mutin          |                 |
|            | Myaochan Ridge, Levaya Silinka River                                                                | 50.7403 N/<br>136.4794 E         | 550           | 25.06.1982        | 1♀, 3 nymphs      | V.A. Mutin          |                 |
|            | Myaochan Ridge, settlement Gorny, elfin woodland                                                    | 50.7686 N/<br>136.3922 E         | 650           | 29.08.1983        | 2♀, 10 nymphs     | S.Yu. Storozhenko   |                 |
|            | same locality                                                                                       |                                  |               | 10.07.1986        | 1♂                | V.Ya. Nebaikin      |                 |
|            | same locality                                                                                       |                                  |               | 19.06.1997        | 1♂                | V.A. Mutin          |                 |
|            | Myaochan Ridge, 3 km NE settlement Gorny, alder woodland                                            | 50.7803 N/<br>136.4764 E         | 600           | 16–<br>17.07.2011 | 2♀                | E.S. Koshkin        |                 |
|            | Myaochan Ridge, 10 km SW settlement Gorny, spruce forest                                            | 50.7228 N/<br>136.3128 E         |               | 8.06.1984         | 1 nymph           | V.N. Makarkin       |                 |
|            | same locality                                                                                       |                                  | 800           | 28.05.2005        | 1♀, 1 nymph       | M.Yu. Proshchalykin |                 |
|            | same locality                                                                                       |                                  |               | 29.06.2005        | 2 nymphs          | V.A. Mutin          |                 |
|            | same locality                                                                                       |                                  | 500           | 29.06.2005        | 1♂                | A.S. Lelej          |                 |
|            | Badzhalsky Ridge, Gerbi River basin, upper stream of Omot Makit River                               | 50.5092 N/<br>134.5458 E         | 950–<br>2,100 | 5–<br>19.07.1997  | 12♂, 6♀, 3 nymphs | A.V. Plutenko       |                 |
|            | Dusse-Alin Ridge, Bureika River, subalpine belt                                                     | 51.1061 N/<br>133.5989 E         | 900–<br>1,100 | 15–<br>20.06.2009 | 2♂                | E.S. Koshkin        | Bureinsky       |
|            | Dusse-Alin Ridge, 5 km below the confluence of the Pravaya and Levaya Bureya Rivers, subalpine belt | 51.6292 N/<br>134.2578 E         | 900–<br>1,100 | 20.07.2000        | 1♀, 1 nymph       | A.G. Blyummer       | Bureinsky       |
|            | Dusse-Alin Ridge, 3 km below the confluence of the Pravaya and Levaya Bureya Rivers,                | 51.6417 N/<br>134.2769 E         | 570           | 6.06.2011         | 1♂                | E.S. Koshkin        | Bureinsky       |
|            | Dusse-Alin Ridge, upper stream of Levaya Bureya River, vicinity of Korbokhon Lake                   | 52.0264 N/<br>135.0728 E         | 1,200         | 27.06.2011        | 1♂                | E.S. Koshkin        | Bureinsky       |
|            | Dusse-Alin Ridge, upper stream of Levaya Bureya River, vicinity of Medvezhy Lake,                   | 52.0886 N/<br>135.0117 E         | 1,615         | 2.07.2011         | 1♂                | E.S. Koshkin        | Bureinsky       |
|            | Dusse-Alin Ridge, upper stream of Levaya Bureya River, pass between the lakes Medvezhy and Gornoe   | 52.0803 N/<br>135.0208 E         | 1,755         | 2.07.2011         | 1♂, 1 nymph       | E.S. Koshkin        | Bureinsky       |

|                                |                                                                                        |                           |                 |            |                |                    |        |
|--------------------------------|----------------------------------------------------------------------------------------|---------------------------|-----------------|------------|----------------|--------------------|--------|
|                                | Bureinsky Ridge,<br>Urma River basin,<br>upper stream of<br>Pravy Omot River,<br>scree | 50.4222 N/<br>134.2072 E  | 1,600–<br>1,650 | 29.06.1978 | 1♂             | A.A.<br>Nazarenko  |        |
|                                | Aezop Ridge,<br>subalpine belt                                                         | 52.5661 N,<br>134.0369' E | 1,400           | 10.07.1978 | 2♂             | E.V.<br>Novomodnyi |        |
| Jewish<br>Autonomous<br>Region | Bastak Nature<br>Reserve, Bydyr<br>Mountain                                            | 49.2108 N/<br>133.0579 E  | 1,200           | 29.05.2014 | 1 nymph        | A. Averin          | Bastak |
|                                | same locality                                                                          |                           |                 | 17.06.2022 | 1♂, 1<br>nymph | A. Averin          | Bastak |

In bold — the type locality
